# Supplementary material
Source: PubMed Central journal article supplement (PMC8755029)
Supplement: nqab201_supplemental_file.pdf [file nqab201_supplemental_file.pdf]

Higher diet quality relates to decelerated epigenetic aging; Y Kim et al.

On-line Supplementary Material

## **Supplementary Methods**

### **Diet quality score**

The Alternate Health Eating Index (AHEI) (1) and a modified Mediterranean-style Diet Score (MDS) (2) were used to confirm the association between diet quality and epigenetic age acceleration. The AHEI score essentially reflects concordance of an individual's diet with the current Dietary Guidelines for Americans (1, 3), while the MDS represents the major characteristics of the Mediterranean-type diet (2).

Eleven components considered in the AHEI score are vegetables, fruits, nuts and legumes, whole grains, red and processed meat, sugar-sweetened beverages and fruit juice, EPA and DHA, PUFA (without EPA and DHA), trans-fatty acids, sodium, and alcohol (4). Each component scores from 0 (unhealthy) to 10 (healthiest), with a higher score assigned to moderate alcohol drinking and higher intakes of fruits, vegetables, whole grains, nuts and legumes, EPA and DHA, and PUFA, as well as to lower intakes of sugar-sweetened beverages, red and processed meat, trans-fatty acids, and sodium (1). It comprises a total of 110 scores with a higher score reflecting a healthier diet.

The MDS incorporates 9 components, including vegetables, fruits, nuts, legumes, whole grains, fish, red and processed meat, ratio of MUFA to SFA, and alcohol (2). Consumption of each component was categorized into sex-specific quartiles (5). A score of 0 to 3 was assigned

Higher diet quality relates to decelerated epigenetic aging; Y Kim et al.

On-line Supplementary Material

according to the quartile rank to each component except for red and processed meat and alcohol. For red and processed meat, the order of the scores was reversed (i.e. the highest quartile was assigned a score of 0). Moderate alcohol consumption (i.e., 10–25 grams/day for men and 5–15 grams/day for women) was assigned a value of one. The MDS comprises a total of 25, with a higher score reflecting better adherence to the overall Mediterranean dietary pattern.

## Reference

1. Chiuve SE, Fung TT, Rimm EB, Hu FB, McCullough ML, Wang M, Stampfer MJ, Willett WC. Alternative dietary indices both strongly predict risk of chronic disease. *J Nutr* 2012;142(6):1009-18. doi: 10.3945/jn.111.157222.
2. Fung TT, Rexrode KM, Mantzoros CS, Manson JE, Willett WC, Hu FB. Mediterranean diet and incidence of and mortality from coronary heart disease and stroke in women. *Circulation* 2009;119(8):1093-100. doi: 10.1161/CIRCULATIONAHA.108.816736.
3. Health UDo, Services H. US Department of Agriculture. 2015–2020 dietary guidelines for Americans. Washington, DC, 2015.
4. Fung TT, Chiuve SE, McCullough ML, Rexrode KM, Logroscino G, Hu FB. Adherence to a DASH-style diet and risk of coronary heart disease and stroke in women. *Arch Intern Med* 2008;168(7):713-20. doi: 10.1001/archinte.168.7.713.
5. Ma J, Hennein R, Liu C, Long MT, Hoffmann U, Jacques PF, Lichtenstein AH, Hu FB, Levy D. Improved Diet Quality Associates With Reduction in Liver Fat, Particularly in Individuals With High Genetic Risk Scores for Nonalcoholic Fatty Liver Disease. *Gastroenterology* 2018;155(1):107-17. doi: 10.1053/j.gastro.2018.03.038.

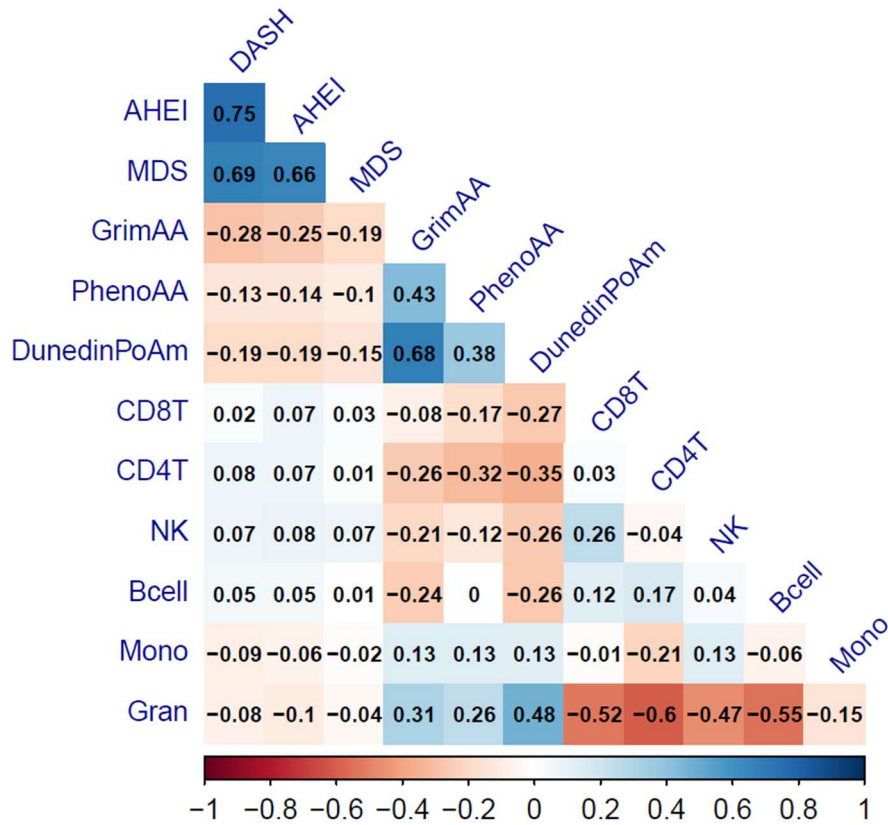

Supplementary Figure 1. Pearson correlation matrix of diet quality scores and blood cell counts. The Houseman algorithm was used for estimating blood cell counts. AHEI, Alternative healthy eating index; DASH, Dietary Approaches to Stop Hypertension score; DunedinPoAm, Dunedin Pace of Aging Methylation; GrimAA, DNA methylation GrimAge acceleration; Gran, Granulocytes; MDS, Mediterranean-style dietary score; Mono, monocytes; NK, natural killer; PhenoAA, DNA methylation PhenoAge acceleration.

Higher diet quality relates to decelerated epigenetic aging; Y Kim et al.  
 On-line Supplementary Material

Supplementary Table 1. Predictors for developing epigenetic aging measures

| Measures    | Biomarkers                                                                                                                                                                                                                                                                                                                                                                                                                                                                                                    |
|-------------|---------------------------------------------------------------------------------------------------------------------------------------------------------------------------------------------------------------------------------------------------------------------------------------------------------------------------------------------------------------------------------------------------------------------------------------------------------------------------------------------------------------|
| DunedinPoam | Glycated hemoglobin, maximum oxygen uptake, waist-hip ratio, forced expiratory volume in one second, the ratio of the forced expiratory volume in the first one second to the forced vital capacity, mean arterial pressure, body mass index, leukocyte telomere length, creatinine clearance, urea nitrogen, lipoprotein (a), triglycerides, gum health, total cholesterol, white blood cell count, high-sensitivity C-reactive protein, high-density lipoprotein-cholesterol, and apolipoprotein B/A1 ratio |
| GrimAA      | DNA methylation-based markers of plasma proteins (adrenomedullin, beta-2-microglobulin, cystatin C, growth differentiation factor 15, leptin, plasminogen activation inhibitor 1, and tissue inhibitor metalloproteinases 1), DNA methylation-based estimator of smoking pack-years, chronological age, and sex                                                                                                                                                                                               |
| PhenoAA     | Albumin, creatinine, serum glucose, C-reactive protein, percentage of lymphocyte, mean red cell volume, red cell distribution width, alkaline phosphatase, white blood cell count, and chronological age                                                                                                                                                                                                                                                                                                      |

DunedinPoAm, Dunedin Pace of Aging Methylation; GrimAA, DNAm GrimAge Acceleration; PhenoAA, accelerated DNAm PhenoAge Acceleration.

Supplementary Table 2. Association between diet quality score and epigenetic age acceleration

|             | $\beta$ | SE   | <i>p</i> -value |
|-------------|---------|------|-----------------|
| <b>DASH</b> |         |      |                 |
| DunedinPoAm | -0.05   | 0.02 | 0.007           |
| GrimAA      | -0.09   | 0.02 | 4.9E-07         |
| PhenoAA     | -0.07   | 0.02 | 0.001           |
| <b>AHEI</b> |         |      |                 |
| DunedinPoAm | -0.07   | 0.02 | 4.6E-04         |
| GrimAA      | -0.10   | 0.02 | 9.9E-09         |
| PhenoAA     | -0.10   | 0.02 | 3.4E-05         |
| <b>MDS</b>  |         |      |                 |
| DunedinPoAm | -0.08   | 0.02 | 3.7E-04         |
| GrimAA      | -0.08   | 0.02 | 2.9E-05         |
| PhenoAA     | -0.07   | 0.02 | 0.002           |

AHEI, Alternate Health Eating Index; DASH, Dietary Approaches to Stop Hypertension; DunedinPoAm, Dunedin Pace of Aging Methylation; GrimAA, DNA methylation GrimAge Acceleration; LCI, lower value of the 95 % confidence interval; UCI, upper value of the 95 % confidence interval; PhenoAA, DNA methylation PhenoAge Acceleration; MDS, Mediterranean-style Diet Score. Linear mixed effects models were fitted to estimate regression coefficients ( $\beta$ s) and 95% CIs with a diet quality score as a fixed effect and family structure as a random effect. The DASH score and epigenetic age acceleration measures were standardized to a mean of 0 and SD of 1. Model was adjusted for categorical smoking status, age, sex, body mass index, physical activity score, alcohol consumption, and energy intake.

Supplementary Table 3. Association between diet quality score and epigenetic age acceleration: Sensitivity analyses considering blood cell counts

|             | $\beta$ | SE    | <i>p</i> -value |
|-------------|---------|-------|-----------------|
| <b>DASH</b> |         |       |                 |
| DunedinPoAm | -0.042  | 0.018 | 0.020           |
| GrimAA      | -0.083  | 0.017 | 9.2E-07         |
| PhenoAA     | -0.059  | 0.022 | 0.009           |
| <b>AHEI</b> |         |       |                 |
| DunedinPoAm | -0.052  | 0.018 | 0.004           |
| GrimAA      | -0.098  | 0.017 | 4.8E-09         |
| PhenoAA     | -0.082  | 0.022 | 1.8E-04         |
| <b>MDS</b>  |         |       |                 |
| DunedinPoAm | -0.068  | 0.019 | 3.3E-04         |
| GrimAA      | -0.080  | 0.018 | 6.4E-06         |
| PhenoAA     | -0.054  | 0.023 | 0.020           |

AHEI, Alternate Health Eating Index; DASH, Dietary Approaches to Stop Hypertension; DunedinPoAm, Dunedin Pace of Aging Methylation; GrimAA, DNA methylation GrimAge Acceleration; LCI, lower value of the 95 % confidence interval; UCI, upper value of the 95 % confidence interval; PhenoAA, DNA methylation PhenoAge Acceleration; MDS, Mediterranean-style Diet Score. Linear mixed effects models were fitted to estimate regression coefficients ( $\beta$ s) and 95% CIs with a diet quality score as a fixed effect and family structure as a random effect. The DASH score and epigenetic age acceleration measures were standardized to a mean of 0 and SD of 1. Model was adjusted for age, sex, smoking status, body mass index, physical activity score, alcohol consumption, energy intake, and blood cell counts (CD8+ T cells, CD4+ T, natural killer, B cells, and granulocytes).

Supplementary Table 4. Interaction between DASH and potential effect modifiers on epigenetic age acceleration

| Effect modifier              | DunedinPoAm |       |                 | GrimAA  |       |                 | Age-/Smoking pack-year-adjusted GrimAA |       |                 | PhenoAA |       |                 |
|------------------------------|-------------|-------|-----------------|---------|-------|-----------------|----------------------------------------|-------|-----------------|---------|-------|-----------------|
|                              | $\beta$     | SE    | <i>p</i> -value | $\beta$ | SE    | <i>p</i> -value | $\beta$                                | SE    | <i>p</i> -value | $\beta$ | SE    | <i>p</i> -value |
| Age                          | -0.004      | 0.002 | 0.070           | -0.003  | 0.002 | 0.099           | -0.001                                 | 0.003 | 0.636           | -0.004  | 0.003 | 0.118           |
| Sex                          | 0.063       | 0.040 | 0.119           | 0.054   | 0.034 | 0.114           | 0.068                                  | 0.044 | 0.124           | 0.009   | 0.046 | 0.847           |
| BMI                          | 0.008       | 0.004 | 0.042           | 0.005   | 0.003 | 0.119           | 0.013                                  | 0.004 | 0.002           | 0.006   | 0.004 | 0.162           |
| Smoking status               |             |       |                 |         |       |                 |                                        |       |                 |         |       |                 |
| Never-/Ever-smokers          | -0.178      | 0.041 | 1.3E-05         | -0.231  | 0.036 | 1.1E-10         | -0.258                                 | 0.035 | 2.4E-13         | -0.068  | 0.045 | 0.131           |
| Never/Former/Current-smokers | -0.130      | 0.031 | 2.8E-05         | -0.165  | 0.026 | 2.2E-10         | -0.180                                 | 0.024 | 6.4E-14         | -0.042  | 0.035 | 0.221           |
| Physical activity            | 0.005       | 0.003 | 0.112           | 0.004   | 0.003 | 0.119           | -0.001                                 | 0.004 | 0.798           | 0.008   | 0.004 | 0.032           |

DASH, Dietary Approaches to Stop Hypertension; DunedinPoAm, Dunedin Pace of Aging Methylation; GrimAA, DNA methylation GrimAge Acceleration; PhenoAA, DNA methylation PhenoAge Acceleration. Linear mixed effects models were fitted to estimate regression coefficients ( $\beta$ s) and standard errors (SE) with the DASH score, each effect modifier variable (age, sex, BMI, smoking status, and physical activity), and interactions between the DASH score and effect modifier variable as fixed effects and family structure as a random effect. The DASH score and epigenetic age acceleration measures were standardized to a mean of 0 and SD of 1. Model was adjusted for age, sex, BMI, smoking status, physical activity score, alcohol consumption, and energy intake.

Higher diet quality relates to decelerated epigenetic aging; Y Kim et al.  
 On-line Supplementary Material

Supplementary Table 5. Association between DASH and epigenetic age acceleration according to smoking status

| Smoking status                   | Epigenetic age acceleration | DunedinPoAm |        |        |                 | GrimAA  |        |        |                 | PhenoAA |        |        |                 |
|----------------------------------|-----------------------------|-------------|--------|--------|-----------------|---------|--------|--------|-----------------|---------|--------|--------|-----------------|
|                                  |                             | $\beta$     | LCI    | UCI    | <i>p</i> -value | $\beta$ | LCI    | UCI    | <i>p</i> -value | $\beta$ | LCI    | UCI    | <i>p</i> -value |
| Never smoker ( <i>n</i> = 1,149) |                             | -0.016      | -0.065 | 0.032  | 0.511           | -0.030  | -0.066 | 0.007  | 0.115           | -0.062  | -0.121 | -0.003 | 0.040           |
| Ever smoker ( <i>n</i> = 846)    |                             | -0.178      | -0.249 | -0.106 | 1.4E-06         | -0.249  | -0.317 | -0.180 | 4.2E-12         | -0.104  | -0.174 | -0.034 | 0.004           |
| Former smoker ( <i>n</i> = 687)  |                             | -0.082      | -0.153 | -0.011 | 0.023           | -0.133  | -0.201 | -0.065 | 1.6E-04         | -0.076  | -0.158 | 0.006  | 0.070           |
| Current smoker ( <i>n</i> = 159) |                             | -0.152      | -0.357 | 0.054  | 0.142           | -0.256  | -0.407 | -0.105 | 0.002           | -0.108  | -0.257 | 0.041  | 0.150           |

BMI, Body mass index; DASH, Dietary Approaches to Stop Hypertension diet score; DunedinPoAm, Dunedin Pace of Aging Methylation; GrimAA, DNAm GrimAge Acceleration; LCI, lower value of the 95 % confidence interval; UCI, upper value of the 95 % confidence interval; PhenoAA, accelerated DNAm PhenoAge Acceleration. Linear mixed effects models were fitted to estimate regression coefficients ( $\beta$ s) and 95% CIs with the DASH score as a fixed effect and family structure as a random effect. The DASH score and epigenetic age acceleration measures were standardized to a mean of 0 and SD of 1. Model was adjusted for age, sex, BMI, physical activity score, alcohol consumption, and energy intake. Each stratification factor was removed from the covariates.



Supplementary Table 6. Longitudinal associations of diet quality score and epigenetic age acceleration on the risk of all-cause mortality

|                             | HR    | LCI   | UCI   | <i>p</i> -value |
|-----------------------------|-------|-------|-------|-----------------|
| Epigenetic age acceleration |       |       |       |                 |
| DunedinPoAm                 | 1.394 | 1.206 | 1.610 | 6.8E-06         |
| GrimAA                      | 1.617 | 1.405 | 1.860 | 1.9E-11         |
| PhenoAA                     | 1.226 | 1.093 | 1.375 | 0.001           |
| Diet quality score          |       |       |       |                 |
| DASH                        | 0.880 | 0.778 | 0.996 | 0.043           |
| AHEI                        | 0.859 | 0.757 | 0.974 | 0.018           |
| MDS                         | 0.856 | 0.753 | 0.974 | 0.018           |

AHEI, Alternate Healthy Eating Index score; DASH, Dietary Approaches to Stop Hypertension diet score; DunedinPoAm, Dunedin Pace of Aging Methylation; GrimAA, DNA methylation GrimAge Acceleration; HR, Hazard ratio; LCI, lower value of the 95 % confidence interval; MDS, Mediterranean-style diet score; PhenoAA, DNA methylation PhenoAge Acceleration; SD, standard deviation; UCI, upper value of the 95 % confidence interval. The sample size is 1,899 participants in the analysis for all-cause mortality. Mixed effect Cox proportional hazards model was applied to estimate HRs with 95% CIs for each independent variable per 1 SD increase. Continuous standardized values of each diet quality score or epigenetic age acceleration were entered as independent variables in separate models. The model was adjusted for age, sex, smoking status, BMI, physical activity score, alcohol consumption, energy intake, systolic blood pressure, use of antihypertension medications, high density lipoprotein cholesterol, total cholesterol, type 2 diabetes, and history of cardiovascular disease and cancer. For measures of epigenetic age acceleration, models were further adjusted for differential blood counts (CD8+ T cells, CD4+ T, natural killer, B cells, and granulocytes).

Supplementary Table 7. Mediation effect of epigenetic age acceleration on the association of diet quality scores with all-cause mortality

| DNAmAge       | AHEI  |       |       |         |                         | MDS   |       |       |         |                         |
|---------------|-------|-------|-------|---------|-------------------------|-------|-------|-------|---------|-------------------------|
|               | HR    | LCI   | UCI   | p-value | Proportion mediated (%) | HR    | LCI   | UCI   | p-value | Proportion mediated (%) |
| All           |       |       |       |         |                         |       |       |       |         |                         |
| DunedinPoAm   | 0.975 | 0.956 | 0.990 | 0.012   | 20.8%                   | 0.972 | 0.952 | 0.988 | 0.009   | 27.5%                   |
| AgeAccelGrim  | 0.957 | 0.937 | 0.975 | 2.2E-04 | 37.5%                   | 0.967 | 0.948 | 0.984 | 0.002   | 29.5%                   |
| AgeAccelPheno | 0.975 | 0.958 | 0.988 | 0.005   | 15.7%                   | 0.980 | 0.964 | 0.993 | 0.019   | 13.6%                   |
| Never smoker  |       |       |       |         |                         |       |       |       |         |                         |
| DunedinPoAm   | 0.986 | 0.964 | 1.002 | 0.156   | 23.9%                   | 0.980 | 0.957 | 0.998 | 0.095   | 0.0%                    |
| AgeAccelGrim  | 0.981 | 0.961 | 0.996 | 0.061   | 25.5%                   | 0.984 | 0.965 | 1.000 | 0.106   | 54.1%                   |
| AgeAccelPheno | 0.979 | 0.957 | 0.995 | 0.056   | 53.8%                   | 0.980 | 0.957 | 0.996 | 0.070   | 19.7%                   |
| Ever smoker   |       |       |       |         |                         |       |       |       |         |                         |
| DunedinPoAm   | 0.928 | 0.884 | 0.965 | 0.005   | 23.6%                   | 0.930 | 0.886 | 0.968 | 0.007   | 23.8%                   |
| AgeAccelGrim  | 0.891 | 0.844 | 0.933 | 1.6E-04 | 43.2%                   | 0.915 | 0.870 | 0.954 | 0.001   | 28.2%                   |
| AgeAccelPheno | 0.966 | 0.937 | 0.989 | 0.024   | 11.0%                   | 0.978 | 0.951 | 1.001 | 0.102   | 7.0%                    |

AHEI, Alternate Health Eating Index; DASH, Dietary Approaches to Stop Hypertension; DunedinPoAm, Dunedin Pace of Aging Methylation; GrimAA, DNA methylation GrimAge Acceleration; HR, Hazard ratio; LCI, lower value of the 95 % confidence interval; SD, standard deviation; UCI, upper value of the 95 % confidence interval; PhenoAA, DNA methylation PhenoAge Acceleration; MDS, Mediterranean-style Diet Score. Hazard ratios per 1 increase of SD of DASH score in standardized z-score and *P* values were derived from mixed effect Cox proportional hazard models. Linear mixed effect model was estimated for epigenetic age acceleration (mediator) conditional on the DASH score (exposure) and covariates. Mixed effect Cox proportional hazard model was estimated for all-cause mortality (outcome) conditional on the DASH score, epigenetic age acceleration, and covariates to estimate the indirect (mediation) effect. The proportion of mediation was calculated as the ratio of indirect effect to the sum of both direct and indirect effect using R package mediation. Models were adjusted for age, sex, body mass index, smoking status, physical activity score, alcohol intake, energy intake, body mass index, systolic blood pressure, hypertension medications, high-density lipoprotein cholesterol, total cholesterol, type 2 diabetes, and history of cardiovascular disease and cancer. For stratified analysis on smoking status, the same covariates, except for smoking status, were used as in the models for all participants.

Supplementary Table 8. Significance level for mediation effect of epigenetic age acceleration on the association of diet with all-cause mortality after additional adjustment for metformin use

| DNAmAge       | DASH  | AHEI    | MDS   |
|---------------|-------|---------|-------|
| DunedinPoAm   | 0.021 | 0.007   | 0.006 |
| AgeAccelGrim  | 0.001 | 9.6E-05 | 0.001 |
| AgeAccelPheno | 0.022 | 0.005   | 0.018 |

AHEI, Alternate Health Eating Index; DASH, Dietary Approaches to Stop Hypertension; DunedinPoAm, Dunedin Pace of Aging Methylation; GrimAA, DNA methylation GrimAge Acceleration; PhenoAA, DNA methylation PhenoAge Acceleration; MDS, Mediterranean-style Diet Score. Linear mixed effect and mixed effect Cox proportional hazard models were estimated to estimate the indirect (mediation) effect. Models were further adjusted for metformin use ( $n = 111$ ) in addition to age, sex, body mass index, smoking status, physical activity score, alcohol intake, energy intake, body mass index, systolic blood pressure, hypertension medications, high-density lipoprotein cholesterol, total cholesterol, type 2 diabetes, and history of cardiovascular disease and cancer.

Supplementary Table 9. Association between individual DASH components and epigenetic age acceleration

| Diet                      | DunedinPoAm |       |                              |                              | GrimAA  |       |                              |                              | PhenoAA |       |                              |                              |
|---------------------------|-------------|-------|------------------------------|------------------------------|---------|-------|------------------------------|------------------------------|---------|-------|------------------------------|------------------------------|
|                           | $\beta$     | SE    | <i>p</i> -value <sup>1</sup> | <i>p</i> -value <sup>2</sup> | $\beta$ | SE    | <i>p</i> -value <sup>1</sup> | <i>p</i> -value <sup>2</sup> | $\beta$ | SE    | <i>p</i> -value <sup>1</sup> | <i>p</i> -value <sup>2</sup> |
| Vegetables                | -0.026      | 0.015 | 0.078                        | 0.154                        | -0.029  | 0.013 | 0.020                        | 0.027                        | -0.031  | 0.017 | 0.062                        | 0.043                        |
| Fruits                    | -0.021      | 0.015 | 0.166                        | 0.225                        | -0.039  | 0.013 | 0.002                        | 0.003                        | -0.041  | 0.017 | 0.018                        | 0.014                        |
| Nuts and Legumes          | -0.047      | 0.014 | 0.001                        | 0.001                        | -0.028  | 0.012 | 0.021                        | 0.022                        | -0.042  | 0.016 | 0.011                        | 0.010                        |
| Whole grains              | -0.027      | 0.014 | 0.059                        | 0.094                        | -0.025  | 0.012 | 0.044                        | 0.056                        | -0.015  | 0.016 | 0.361                        | 0.345                        |
| Low fat dairy             | -0.003      | 0.015 | 0.838                        | 0.855                        | -0.024  | 0.012 | 0.055                        | 0.056                        | 0.023   | 0.017 | 0.167                        | 0.165                        |
| Red and processed meats   | 0.015       | 0.015 | 0.315                        | 0.668                        | 0.034   | 0.013 | 0.008                        | 0.032                        | 0.025   | 0.017 | 0.142                        | 0.181                        |
| Sugar-sweetened beverages | 0.007       | 0.015 | 0.633                        | 0.838                        | 0.017   | 0.013 | 0.184                        | 0.430                        | 0.050   | 0.017 | 0.004                        | 0.009                        |
| Sodium                    | 0.017       | 0.015 | 0.240                        | 0.269                        | 0.044   | 0.013 | 0.001                        | 0.001                        | 0.027   | 0.017 | 0.109                        | 0.113                        |

DASH, Dietary Approaches to Stop Hypertension diet score; GrimAA, DNAm GrimAge Acceleration; PhenoAA, accelerated DNAm PhenoAge Acceleration; DunedinPoAm, Dunedin Pace of Aging Methylation; SE, standard errors. Linear mixed effects models were fitted to estimate regression coefficients ( $\beta$ s) and SEs with a continuous DASH component score as a fixed effect and family structure as a random effect.

<sup>1</sup> Model was adjusted for age, sex, BMI, smoking status, physical activity score, alcohol consumption, and energy intake.

<sup>2</sup> Model was further adjusted for modified DASH score by excluding each of the individual components from the total DASH score

Supplementary Table 10. Association between individual DASH components and epigenetic age acceleration according to smoking status

| Diet                            | DunedinPoAm |       |                 | GrimAA  |       |                 | PhenoAA |       |                 |
|---------------------------------|-------------|-------|-----------------|---------|-------|-----------------|---------|-------|-----------------|
|                                 | $\beta$     | SE    | <i>p</i> -value | $\beta$ | SE    | <i>p</i> -value | $\beta$ | SE    | <i>p</i> -value |
| Never smoker ( <i>n</i> =1,149) |             |       |                 |         |       |                 |         |       |                 |
| Vegetables                      | -0.016      | 0.017 | 0.360           | -0.004  | 0.013 | 0.756           | -0.022  | 0.021 | 0.301           |
| Fruits                          | -0.013      | 0.018 | 0.454           | -0.011  | 0.013 | 0.414           | -0.020  | 0.022 | 0.356           |
| Nuts and Legumes                | -0.027      | 0.017 | 0.107           | -0.026  | 0.013 | 0.042           | -0.054  | 0.020 | 0.008           |
| Whole grains                    | 0.009       | 0.017 | 0.593           | -0.005  | 0.013 | 0.696           | -0.013  | 0.021 | 0.522           |
| Low fat dairy                   | 0.015       | 0.017 | 0.368           | 0.006   | 0.013 | 0.617           | 0.025   | 0.021 | 0.235           |
| Red and processed meats         | 0.018       | 0.017 | 0.300           | 0.025   | 0.013 | 0.053           | 0.048   | 0.021 | 0.023           |
| Sugar-sweetened beverages       | -0.001      | 0.018 | 0.950           | 0.007   | 0.014 | 0.598           | 0.033   | 0.022 | 0.131           |
| Sodium                          | 0.001       | 0.017 | 0.959           | 0.012   | 0.013 | 0.380           | 0.018   | 0.021 | 0.403           |
| Ever smoker ( <i>n</i> =846)    |             |       |                 |         |       |                 |         |       |                 |
| Vegetables                      | -0.057      | 0.025 | 0.026           | -0.069  | 0.025 | 0.005           | -0.031  | 0.025 | 0.218           |
| Fruits                          | -0.060      | 0.026 | 0.023           | -0.099  | 0.025 | 1.1E-04         | -0.065  | 0.026 | 0.012           |
| Nuts and Legumes                | -0.096      | 0.025 | 1.8E-04         | -0.076  | 0.025 | 0.002           | -0.047  | 0.025 | 0.059           |
| Whole grains                    | -0.099      | 0.025 | 9.3E-05         | -0.097  | 0.024 | 8.5E-05         | -0.028  | 0.025 | 0.257           |
| Low fat dairy                   | -0.052      | 0.026 | 0.045           | -0.086  | 0.025 | 0.001           | 0.006   | 0.025 | 0.827           |
| Red and processed meats         | 0.027       | 0.026 | 0.310           | 0.059   | 0.025 | 0.022           | 0.016   | 0.026 | 0.547           |
| Sugar-sweetened beverages       | 0.046       | 0.027 | 0.082           | 0.078   | 0.026 | 0.002           | 0.069   | 0.026 | 0.008           |
| Sodium                          | 0.046       | 0.025 | 0.072           | 0.087   | 0.024 | 4.4E-04         | 0.017   | 0.025 | 0.496           |

DASH, Dietary Approaches to Stop Hypertension diet score; DunedinPoAm, Dunedin Pace of Aging Methylation; GrimAA, DNAm GrimAge Acceleration; PhenoAA, accelerated DNAm PhenoAge Acceleration; SE, standard errors. For stratified analysis, in each smoking status group, linear mixed effects models were fitted to estimate regression coefficients ( $\beta$ s) and SEs with a continuous DASH component score as a fixed effect and family structure as a random effect. Three measures of epigenetic age acceleration were standardized to a mean of 0 and SD of 1. Model was adjusted for age, sex, BMI, physical activity score, alcohol consumption, and energy intake.
